# Supplementary material for: Using Robson's Ten‐Group Classification System for comparing caesarean section rates in Europe: an analysis of routine data from the Euro‐Peristat study
Source: PubMed Central journal article supplement (PMC8359161; doi:10.1111/1471-0528.16634), 2021-02-01
Supplement: BJO-128-1444-s004.pdf [file BJO-128-1444-s004.pdf]

**Table S1.** Robson's Ten Group Classification System, including sub-groups, in Belgium 2015

|                                                                                         | Number of<br>CS/ all<br>women in<br>each group | Number of<br>CS/ all<br>women in<br>each group<br>imputed<br>data | Relative<br>size of<br>each<br>group<br>(%) | CS rate<br>in each<br>group<br>(%) | Contribution<br>of each<br>group<br>(%) |
|-----------------------------------------------------------------------------------------|------------------------------------------------|-------------------------------------------------------------------|---------------------------------------------|------------------------------------|-----------------------------------------|
| Group 1: Nullip single ceph $\geq$ 37 wks spon lab                                      | 2710/28844                                     | 2760/29356                                                        | 24.3                                        | 9.4                                | 2.3                                     |
| Group 2a: Nullip single ceph $\geq$ 37 wks induced                                      | 3165/13719                                     | 3224/13965                                                        | 11.6                                        | 23.1                               | 2.7                                     |
| Group 2b: Nullip single ceph $\geq$ 37 wks CS before lab                                | 1306/1306                                      | 1330/1330                                                         | 1.1                                         | 100.0                              | 1.1                                     |
| Group 3: Multip (excl prev caesarean sections) single ceph $\geq$ 37 wks spon lab       | 559/33236                                      | 569/33824                                                         | 28.0                                        | 1.7                                | 0.5                                     |
| Group 4a: Multip (excl prev caesarean sections) single ceph $\geq$ 37 wks induced       | 533/15234                                      | 543/15504                                                         | 12.8                                        | 3.5                                | 0.4                                     |
| Group 4b: Multip (excl prev caesarean sections) single ceph $\geq$ 37 wks CS before lab | 761/761                                        | 775/775                                                           | 0.6                                         | 100.0                              | 0.6                                     |
| Group 5: Previous caesarean section single ceph $\geq$ 37 wks                           | 7255/11177                                     | 7389/11380                                                        | 9.4                                         | 64.9                               | 6.1                                     |
| Group 6: All nulliparous, single breeches                                               | 2695/2856                                      | 2745/2909                                                         | 2.4                                         | 94.4                               | 2.3                                     |
| Group 7: All multiparous, single breeches (incl previous caesarean sections)            | 1939/2242                                      | 1975/2283                                                         | 1.9                                         | 86.5                               | 1.6                                     |
| Group 8: All multiple births (incl previous caesarean sections)                         | 1235/2140                                      | 1258/2179                                                         | 1.8                                         | 57.7                               | 1.0                                     |
| Group 9: All single abnormal lies (incl previous caesarean sections)                    | 412/426                                        | 420/434                                                           | 0.4                                         | 96.8                               | 0.3                                     |
| Group 10: All single ceph $\leq$ 36 wks (incl previous caesarean sections)              | 1820/6641                                      | 1854/6760                                                         | 5.6                                         | 27.4                               | 1.5                                     |
| Not stated                                                                              | 217/2116                                       |                                                                   | -                                           | -                                  | -                                       |
| <b>Total</b>                                                                            |                                                |                                                                   | <b>100.0</b>                                |                                    | <b>20.6</b>                             |

Note: missing data are imputed using the observed distributions for caesarean births, then for non-caesarean births. Because of the low proportion of missing data for caesareans, we first imputed the missing data into caesarean/non-caesarean using the overall caesarean rate.

**Table S2.** Robson's Ten Group Classification System, including sub-groups, in Cyprus 2015

|                                                                                         | Number of<br>CS/ all<br>women in<br>each group | Number of<br>CS/ all<br>women in<br>each group<br>imputed<br>data | Relative size<br>of each<br>group<br>(%) | CS rate<br>in each<br>group<br>(%) | Contribution<br>of each<br>group<br>(%) |
|-----------------------------------------------------------------------------------------|------------------------------------------------|-------------------------------------------------------------------|------------------------------------------|------------------------------------|-----------------------------------------|
| Group 1: Nullip single ceph $\geq$ 37 wks spon lab                                      | 403/1719                                       | 409/1748                                                          | 19.0                                     | 23.4                               | 4.5                                     |
| Group 2a: Nullip single ceph $\geq$ 37 wks induced                                      | 409/901                                        | 415/916                                                           | 10.0                                     | 45.3                               | 4.5                                     |
| Group 2b: Nullip single ceph $\geq$ 37 wks CS before lab                                | 1076/1076                                      | 1091/1091                                                         | 11.9                                     | 100.0                              | 11.9                                    |
| Group 3: Multip (excl prev caesarean sections) single ceph $\geq$ 37 wks spon lab       | 74/1449                                        | 75/1474                                                           | 16.1                                     | 5.1                                | 0.8                                     |
| Group 4a: Multip (excl prev caesarean sections) single ceph $\geq$ 37 wks induced       | 60/524                                         | 61/533                                                            | 5.8                                      | 11.4                               | 0.7                                     |
| Group 4b: Multip (excl prev caesarean sections) single ceph $\geq$ 37 wks CS before lab | 330/330                                        | 335/335                                                           | 3.7                                      | 100.0                              | 3.7                                     |
| Group 5: Previous caesarean section single ceph $\geq$ 37 wks                           | 1643/1731                                      | 1666/1756                                                         | 19.1                                     | 94.9                               | 18.2                                    |
| Group 6: All nulliparous, single breeches                                               | 187/191                                        | 190/194                                                           | 2.1                                      | 97.9                               | 2.1                                     |
| Group 7: All multiparous, single breeches (incl previous caesarean sections)            | 116/121                                        | 118/123                                                           | 1.3                                      | 95.9                               | 1.3                                     |
| Group 8: All multiple births (incl previous caesarean sections)                         | 233/250                                        | 236/253                                                           | 2.8                                      | 93.3                               | 2.6                                     |
| Group 9: All single abnormal lies (incl previous caesarean sections)                    | 22/23                                          | 22/23                                                             | 0.3                                      | 95.7                               | 0.2                                     |
| Group 10: All single ceph $\leq$ 36 wks (incl previous caesarean sections)              | 500/719                                        | 507/730                                                           | 8.0                                      | 69.5                               | 5.5                                     |
| Not stated                                                                              | 72/141                                         |                                                                   | -                                        | -                                  | -                                       |
| <b>Total</b>                                                                            |                                                |                                                                   | <b>100.0</b>                             |                                    | <b>55.9</b>                             |

Note: missing data are imputed using the observed distributions for caesarean births, then for non-caesarean births.

**Table S3.** Robson's Ten Group Classification System, including sub-groups, in Denmark 2015

|                                                                                               | Number of<br>CS/ all<br>women in<br>each group | Number of<br>CS/ all<br>women in<br>each group<br>imputed<br>data | Relative<br>size of<br>each<br>group<br>(%) | CS rate<br>in each<br>group<br>(%) | Contribution<br>of each<br>group<br>(%) |
|-----------------------------------------------------------------------------------------------|------------------------------------------------|-------------------------------------------------------------------|---------------------------------------------|------------------------------------|-----------------------------------------|
| Group 1: Nullip single ceph $\geq$ 37<br>wks spon lab                                         | 1699/16951                                     | 1712/17101                                                        | 29.9                                        | 10.0                               | 3.0                                     |
| Group 2a: Nullip single ceph $\geq$ 37<br>wks induced                                         | 1307/5134                                      | 1317/5178                                                         | 9.1                                         | 25.4                               | 2.3                                     |
| Group 2b: Nullip single ceph $\geq$ 37<br>wks CS before lab                                   | 730/730                                        | 736/736                                                           | 1.3                                         | 100.0                              | 1.3                                     |
| Group 3: Multip (excl prev<br>caesarean sections) single ceph $\geq$<br>37 wks spon lab       | 348/17703                                      | 351/17862                                                         | 31.3                                        | 2.0                                | 0.6                                     |
| Group 4a: Multip (excl prev<br>caesarean sections) single ceph $\geq$<br>37 wks induced       | 296/4495                                       | 298/4535                                                          | 7.9                                         | 6.6                                | 0.5                                     |
| Group 4b: Multip (excl prev<br>caesarean sections) single ceph $\geq$<br>37 wks CS before lab | 948/948                                        | 956/956                                                           | 1.7                                         | 100.0                              | 1.7                                     |
| Group 5: Previous caesarean<br>section single ceph $\geq$ 37 wks                              | 3259/5303                                      | 3285/5347                                                         | 9.4                                         | 61.4                               | 5.8                                     |
| Group 6: All nulliparous, single<br>breeches                                                  | 1107/1207                                      | 1116/1217                                                         | 2.1                                         | 91.7                               | 2.0                                     |
| Group 7: All multiparous, single<br>breeches (incl previous caesarean<br>sections)            | 612/702                                        | 617/708                                                           | 1.2                                         | 87.1                               | 1.1                                     |
| Group 8: All multiple births (incl<br>previous caesarean sections)                            | 616/974                                        | 621/982                                                           | 1.7                                         | 63.2                               | 1.1                                     |
| Group 9: All single abnormal lies<br>(incl previous caesarean sections)                       | 120/132                                        | 121/133                                                           | 0.2                                         | 91.0                               | 0.2                                     |
| Group 10: All single ceph $\leq$ 36 wks<br>(incl previous caesarean sections)                 | 803/2331                                       | 809/2351                                                          | 4.1                                         | 34.4                               | 1.4                                     |
| Not stated                                                                                    | 94/497                                         |                                                                   | -                                           | -                                  | -                                       |
| <b>Total</b>                                                                                  |                                                |                                                                   | <b>100.0</b>                                |                                    | <b>20.9</b>                             |

Note: missing data are imputed using the observed distributions for caesarean births, then for non-caesarean births.

**Table S4.** Robson's Ten Group Classification System, including sub-groups, in Estonia 2015

|                                                                                               | Number of<br>CS/ all<br>women in<br>each group | Number of<br>CS/ all<br>women in<br>each group<br>imputed<br>data | Relative<br>size of<br>each<br>group<br>(%) | CS rate<br>in each<br>group<br>(%) | Contribution<br>of each<br>group<br>(%) |
|-----------------------------------------------------------------------------------------------|------------------------------------------------|-------------------------------------------------------------------|---------------------------------------------|------------------------------------|-----------------------------------------|
| Group 1: Nullip single ceph $\geq$ 37<br>wks spon lab                                         | 357/2932                                       | 357/2932                                                          | 21.4                                        | 12.2                               | 2.6                                     |
| Group 2a: Nullip single ceph $\geq$ 37<br>wks induced                                         | 371/2167                                       | 371/2167                                                          | 15.8                                        | 17.1                               | 2.7                                     |
| Group 2b: Nullip single ceph $\geq$ 37<br>wks CS before lab                                   | 100/100                                        | 100/100                                                           | 0.7                                         | 100.0                              | 0.7                                     |
| Group 3: Multip (excl prev<br>caesarean sections) single ceph $\geq$<br>37 wks spon lab       | 112/3701                                       | 112/3701                                                          | 27.0                                        | 3.0                                | 0.8                                     |
| Group 4a: Multip (excl prev<br>caesarean sections) single ceph $\geq$<br>37 wks induced       | 107/2260                                       | 107/2260                                                          | 16.5                                        | 4.7                                | 0.8                                     |
| Group 4b: Multip (excl prev<br>caesarean sections) single ceph $\geq$<br>37 wks CS before lab | 81/81                                          | 81/81                                                             | 0.6                                         | 100.0                              | 0.6                                     |
| Group 5: Previous caesarean<br>section single ceph $\geq$ 37 wks                              | 759/1281                                       | 759/1281                                                          | 9.3                                         | 59.3                               | 5.5                                     |
| Group 6: All nulliparous, single<br>breeches                                                  | 128/138                                        | 128/138                                                           | 1.0                                         | 92.8                               | 0.9                                     |
| Group 7: All multiparous, single<br>breeches (incl previous caesarean<br>sections)            | 87/97                                          | 87/97                                                             | 0.7                                         | 89.7                               | 0.6                                     |
| Group 8: All multiple births (incl<br>previous caesarean sections)                            | 144/230                                        | 144/230                                                           | 1.7                                         | 62.6                               | 1.0                                     |
| Group 9: All single abnormal lies<br>(incl previous caesarean sections)                       | 157/190                                        | 157/190                                                           | 1.4                                         | 82.6                               | 1.1                                     |
| Group 10: All single ceph $\leq$ 36 wks<br>(incl previous caesarean sections)                 | 175/554                                        | 175/554                                                           | 4.0                                         | 31.6                               | 1.3                                     |
| Not stated                                                                                    | 0/1                                            | -                                                                 | -                                           | -                                  | -                                       |
| <b>Total</b>                                                                                  |                                                |                                                                   | <b>100.0</b>                                |                                    | <b>18.8</b>                             |

Note: missing data are imputed using the observed distributions for caesarean births, then for non-caesarean births.

**Table S5.** Robson's Ten Group Classification System, including sub-groups, in Finland 2015

|                                                                                               | Number of<br>CS/ all<br>women in<br>each group | Number of<br>CS/ all<br>women in<br>each group<br>imputed<br>data | Relative<br>size of<br>each<br>group<br>(%) | CS rate<br>in each<br>group<br>(%) | Contribution<br>of each<br>group<br>(%) |
|-----------------------------------------------------------------------------------------------|------------------------------------------------|-------------------------------------------------------------------|---------------------------------------------|------------------------------------|-----------------------------------------|
| Group 1: Nullip single ceph $\geq$ 37<br>wks spon lab                                         | 1267/13484                                     | 1268/13501                                                        | 24.5                                        | 9.4                                | 2.3                                     |
| Group 2a: Nullip single ceph $\geq$ 37<br>wks induced                                         | 1127/5525                                      | 1128/5532                                                         | 10.1                                        | 20.4                               | 2.1                                     |
| Group 2b: Nullip single ceph $\geq$ 37<br>wks CS before lab                                   | 681/681                                        | 682/682                                                           | 1.2                                         | 100.0                              | 1.2                                     |
| Group 3: Multip (excl prev<br>caesarean sections) single ceph $\geq$<br>37 wks spon lab       | 269/18104                                      | 269/18127                                                         | 33.0                                        | 1.5                                | 0.5                                     |
| Group 4a: Multip (excl prev<br>caesarean sections) single ceph $\geq$<br>37 wks induced       | 151/5125                                       | 151/5131                                                          | 9.3                                         | 2.9                                | 0.3                                     |
| Group 4b: Multip (excl prev<br>caesarean sections) single ceph $\geq$<br>37 wks CS before lab | 394/394                                        | 394/394                                                           | 0.7                                         | 100.0                              | 0.7                                     |
| Group 5: Previous caesarean<br>section single ceph $\geq$ 37 wks                              | 2161/5250                                      | 2163/5256                                                         | 9.6                                         | 41.2                               | 3.9                                     |
| Group 6: All nulliparous, single<br>breeches                                                  | 561/786                                        | 562/787                                                           | 1.4                                         | 71.4                               | 1.0                                     |
| Group 7: All multiparous, single<br>breeches (incl previous caesarean<br>sections)            | 318/533                                        | 318/533                                                           | 1.0                                         | 59.7                               | 0.6                                     |
| Group 8: All multiple births (incl<br>previous caesarean sections)                            | 370/748                                        | 370/748                                                           | 1.4                                         | 49.5                               | 0.7                                     |
| Group 9: All single abnormal lies<br>(incl previous caesarean sections)                       | 743/2124                                       | 744/2127                                                          | 3.9                                         | 35.0                               | 1.4                                     |
| Group 10: All single ceph $\leq$ 36 wks<br>(incl previous caesarean sections)                 | 700/2190                                       | 701/2193                                                          | 4.0                                         | 32.0                               | 1.3                                     |
| Not stated                                                                                    | 8/67                                           | -                                                                 | -                                           | -                                  | -                                       |
| <b>Total</b>                                                                                  |                                                |                                                                   | <b>100.0</b>                                |                                    | <b>15.9</b>                             |

Note: missing data are imputed using the observed distributions for caesarean births, then for non-caesarean births.

**Table S6.** Robson's Ten Group Classification System, including sub-groups, in France 2016

|                                                                                               | Number of<br>CS/ all<br>women in<br>each group | Number of<br>CS/ all<br>women in<br>each group<br>imputed<br>data | Relative<br>size of<br>each<br>group<br>(%) | CS rate<br>in each<br>group<br>(%) | Contribution<br>of each<br>group<br>(%) |
|-----------------------------------------------------------------------------------------------|------------------------------------------------|-------------------------------------------------------------------|---------------------------------------------|------------------------------------|-----------------------------------------|
| Group 1: Nullip single ceph $\geq$ 37<br>wks spon lab                                         | 359/3412                                       | 363/3427                                                          | 26.2                                        | 10.6                               | 2.8                                     |
| Group 2a: Nullip single ceph $\geq$ 37<br>wks induced                                         | 383/1309                                       | 388/1317                                                          | 10.1                                        | 29.5                               | 3.0                                     |
| Group 2b: Nullip single ceph $\geq$ 37<br>wks CS before lab                                   | 102/102                                        | 103/103                                                           | 0.8                                         | 100.0                              | 0.8                                     |
| Group 3: Multip (excl prev<br>caesarean sections) single ceph $\geq$<br>37 wks spon lab       | 64/4210                                        | 65/4226                                                           | 32.3                                        | 1.5                                | 0.5                                     |
| Group 4a: Multip (excl prev<br>caesarean sections) single ceph $\geq$<br>37 wks induced       | 94/1172                                        | 95/1177                                                           | 9.0                                         | 8.1                                | 0.7                                     |
| Group 4b: Multip (excl prev<br>caesarean sections) single ceph $\geq$<br>37 wks CS before lab | 74/74                                          | 75/75                                                             | 0.6                                         | 100.0                              | 0.6                                     |
| Group 5: Previous caesarean<br>section single ceph $\geq$ 37 wks                              | 703/1276                                       | 711/1286                                                          | 9.8                                         | 55.3                               | 5.4                                     |
| Group 6: All nulliparous, single<br>breeches                                                  | 208/261                                        | 210/263                                                           | 2.0                                         | 79.8                               | 1.6                                     |
| Group 7: All multiparous, single<br>breeches (incl previous caesarean<br>sections)            | 163/217                                        | 165/219                                                           | 1.7                                         | 75.3                               | 1.3                                     |
| Group 8: All multiple births (incl<br>previous caesarean sections)                            | 126/233                                        | 127/234                                                           | 1.8                                         | 54.3                               | 1.0                                     |
| Group 9: All single abnormal lies<br>(incl previous caesarean sections)                       | 54/60                                          | 55/61                                                             | 0.5                                         | 90.2                               | 0.4                                     |
| Group 10: All single ceph $\leq$ 36 wks<br>(incl previous caesarean sections)                 | 207/686                                        | 209/690                                                           | 5.3                                         | 30.3                               | 1.6                                     |
| Not stated                                                                                    | 30/67                                          | -                                                                 | -                                           | -                                  | -                                       |
| <b>Total</b>                                                                                  |                                                |                                                                   | <b>100.0</b>                                |                                    | <b>19.6</b>                             |

Note: missing data are imputed using the observed distributions for caesarean births, then for non-caesarean births.

**Table S7.** Robson's Ten Group Classification System, including sub-groups, in Germany 2015

|                                                                                             | Number of<br>CS/ all<br>women in<br>each group | Number of CS/ all<br>women in each<br>group<br><br>imputed data | Relative<br>size of<br>each<br>group<br><br>(%) | CS rate in<br>each<br>group<br><br>(%) | Contribution<br>of each<br>group<br><br>(%) |
|---------------------------------------------------------------------------------------------|------------------------------------------------|-----------------------------------------------------------------|-------------------------------------------------|----------------------------------------|---------------------------------------------|
| Group 1: Nullip single ceph<br>≥ 37 wks spon lab                                            | 35357/196968                                   | 35359/197013                                                    | 27.4                                            | 17.9                                   | 4.9                                         |
| Group 2a: Nullip single<br>ceph ≥ 37 wks induced                                            | 26274/81111                                    | 26275/81127                                                     | 11.3                                            | 32.4                                   | 3.6                                         |
| Group 2b: Nullip single<br>ceph ≥ 37 wks CS before<br>lab                                   | 19545/19545                                    | 19546/19546                                                     | 2.7                                             | 100.0                                  | 2.7                                         |
| Group 3: Multip (excl prev<br>caesarean sections) single<br>ceph ≥ 37 wks spon lab          | 8038/179511                                    | 8038/179557                                                     | 24.9                                            | 4.5                                    | 1.1                                         |
| Group 4a: Multip (excl prev<br>caesarean sections) single<br>ceph ≥ 37 wks induced          | 4205/51987                                     | 4205/52000                                                      | 7.2                                             | 8.1                                    | 0.6                                         |
| Group 4b: Multip (excl prev<br>caesarean sections) single<br>ceph ≥ 37 wks CS before<br>lab | 16285/16285                                    | 16286/16286                                                     | 2.3                                             | 100.0                                  | 2.3                                         |
| Group 5: Previous<br>caesarean section single<br>ceph ≥ 37 wks                              | 54548/79447                                    | 54551/79457                                                     | 11.0                                            | 68.7                                   | 7.6                                         |
| Group 6: All nulliparous,<br>single breeches                                                | 19417/20875                                    | 19418/20876                                                     | 2.9                                             | 93.0                                   | 2.7                                         |
| Group 7: All multiparous,<br>single breeches (incl<br>previous caesarean<br>sections)       | 9557/11111                                     | 9557/11111                                                      | 1.5                                             | 86.0                                   | 1.3                                         |
| Group 8: All multiple births<br>(incl previous caesarean<br>sections)                       | 6479/8544                                      | 6479/8545                                                       | 1.2                                             | 75.8                                   | 0.9                                         |
| Group 9: All single<br>abnormal lies (incl previous<br>caesarean sections)                  | 3260/3454                                      | 3260/3454                                                       | 0.5                                             | 94.4                                   | 0.5                                         |
| Group 10: All single ceph ≤<br>36 wks (incl previous<br>caesarean sections)                 | 25350/50973                                    | 25351/50981                                                     | 7.1                                             | 49.7                                   | 3.5                                         |
| Not stated                                                                                  | 11/142                                         | -                                                               | -                                               | -                                      | -                                           |
| <b>Total</b>                                                                                |                                                |                                                                 | <b>100.0</b>                                    |                                        | <b>31.7</b>                                 |

Note: missing data are imputed using the observed distributions for caesarean births, then for non-caesarean births.

**Table S8.** Robson's Ten Group Classification System, including sub-groups, in Iceland 2015

|                                                                                               | Number of<br>CS/ all<br>women in<br>each group | Number of<br>CS/ all<br>women in<br>each group<br>imputed<br>data | Relative<br>size of<br>each<br>group<br>(%) | CS rate<br>in each<br>group<br>(%) | Contribution<br>of each<br>group<br>(%) |
|-----------------------------------------------------------------------------------------------|------------------------------------------------|-------------------------------------------------------------------|---------------------------------------------|------------------------------------|-----------------------------------------|
| Group 1: Nullip single ceph $\geq$ 37<br>wks spon lab                                         | 86/1021                                        | 86/1041                                                           | 25.6                                        | 8.3                                | 2.1                                     |
| Group 2a: Nullip single ceph $\geq$ 37<br>wks induced                                         | 95/401                                         | 95/408                                                            | 10.0                                        | 23.3                               | 2.3                                     |
| Group 2b: Nullip single ceph $\geq$ 37<br>wks CS before lab                                   | 9/9                                            | 9/9                                                               | 0.2                                         | 100.0                              | 0.2                                     |
| Group 3: Multip (excl prev<br>caesarean sections) single ceph $\geq$<br>37 wks spon lab       | 20/1395                                        | 20/1425                                                           | 35.1                                        | 1.4                                | 0.5                                     |
| Group 4a: Multip (excl prev<br>caesarean sections) single ceph $\geq$<br>37 wks induced       | 9/440                                          | 9/449                                                             | 11.1                                        | 2.0                                | 0.2                                     |
| Group 4b: Multip (excl prev<br>caesarean sections) single ceph $\geq$<br>37 wks CS before lab | 31/31                                          | 31/31                                                             | 0.8                                         | 100.0                              | 0.8                                     |
| Group 5: Previous caesarean<br>section single ceph $\geq$ 37 wks                              | 224/389                                        | 224/393                                                           | 9.7                                         | 57.0                               | 5.5                                     |
| Group 6: All nulliparous, single<br>breeches                                                  | 48/57                                          | 48/57                                                             | 1.4                                         | 84.2                               | 1.2                                     |
| Group 7: All multiparous, single<br>breeches (incl previous caesarean<br>sections)            | 33/37                                          | 33/37                                                             | 0.9                                         | 89.2                               | 0.8                                     |
| Group 8: All multiple births (incl<br>previous caesarean sections)                            | 16/36                                          | 16/36                                                             | 0.9                                         | 44.4                               | 0.4                                     |
| Group 9: All single abnormal lies<br>(incl previous caesarean sections)                       | 19/19                                          | 19/19                                                             | 0.5                                         | 100.0                              | 0.5                                     |
| Group 10: All single ceph $\leq$ 36 wks<br>(incl previous caesarean sections)                 | 52/156                                         | 52/158                                                            | 3.9                                         | 32.9                               | 1.3                                     |
| Not stated                                                                                    | 0/72                                           | -                                                                 | -                                           | -                                  | -                                       |
| <b>Total</b>                                                                                  |                                                |                                                                   | <b>100.0</b>                                |                                    | <b>15.8</b>                             |

Note: missing data are imputed using the observed distributions for caesarean births, then for non-caesarean births.



**Table S9.** Robson's Ten Group Classification System, including sub-groups, in Italy 2015

|                                                                                         | Number of<br>CS/ all<br>women in<br>each group | Number of<br>CS/ all<br>women in<br>each group<br>imputed data | Relative<br>size of<br>each<br>group<br>(%) | CS rate<br>in each<br>group<br>(%) | Contribution<br>of each<br>group<br>(%) |
|-----------------------------------------------------------------------------------------|------------------------------------------------|----------------------------------------------------------------|---------------------------------------------|------------------------------------|-----------------------------------------|
| Group 1: Nullip single ceph $\geq$ 37 wks spon lab                                      | 17321/137708                                   | 18409/140974                                                   | 29.5                                        | 13.1                               | 3.8                                     |
| Group 2a: Nullip single ceph $\geq$ 37 wks induced                                      | 13675/46694                                    | 14534/48150                                                    | 10.1                                        | 30.2                               | 3.0                                     |
| Group 2b: Nullip single ceph $\geq$ 37 wks CS before lab                                | 25626/25626                                    | 27236/27236                                                    | 5.7                                         | 100.0                              | 5.7                                     |
| Group 3: Multip (excl prev caesarean sections) single ceph $\geq$ 37 wks spon lab       | 3274/114610                                    | 3480/116830                                                    | 24.4                                        | 3.0                                | 0.7                                     |
| Group 4a: Multip (excl prev caesarean sections) single ceph $\geq$ 37 wks induced       | 1742/22248                                     | 1851/22728                                                     | 4.8                                         | 8.1                                | 0.4                                     |
| Group 4b: Multip (excl prev caesarean sections) single ceph $\geq$ 37 wks CS before lab | 7098/7098                                      | 7544/7544                                                      | 1.6                                         | 100.0                              | 1.6                                     |
| Group 5: Previous caesarean section single ceph $\geq$ 37 wks                           | 49193/57165                                    | 52283/60399                                                    | 12.6                                        | 86.6                               | 10.9                                    |
| Group 6: All nulliparous, single breeches                                               | 10287/10974                                    | 10933/11632                                                    | 2.4                                         | 94.0                               | 2.3                                     |
| Group 7: All multiparous, single breeches (incl previous caesarean sections)            | 5547/6029                                      | 5895/6386                                                      | 1.3                                         | 92.3                               | 1.2                                     |
| Group 8: All multiple births (incl previous caesarean sections)                         | 6899/8163                                      | 7332/8619                                                      | 1.8                                         | 85.1                               | 1.5                                     |
| Group 9: All single abnormal lies (incl previous caesarean sections)                    | 1718/2400                                      | 1826/2520                                                      | 0.5                                         | 72.5                               | 0.4                                     |
| Group 10: All single ceph $\leq$ 36 wks (incl previous caesarean sections)              | 11243/24430                                    | 11949/25375                                                    | 5.3                                         | 47.1                               | 2.5                                     |
| Not stated                                                                              | 9651/15250                                     |                                                                | -                                           | -                                  | -                                       |
| <b>Total</b>                                                                            |                                                |                                                                | <b>100.0</b>                                |                                    | <b>34.1</b>                             |

Note: missing data are imputed using the observed distributions for caesarean births, then for non-caesarean births.

**Table S10.** Robson's Ten Group Classification System, including sub-groups, in Latvia 2015

|                                                                                               | Number of<br>CS/ all<br>women in<br>each group | Number of<br>CS/ all<br>women in<br>each group<br>imputed<br>data | Relative<br>size of<br>each<br>group<br>(%) | CS rate<br>in each<br>group<br>(%) | Contribution<br>of each<br>group<br>(%) |
|-----------------------------------------------------------------------------------------------|------------------------------------------------|-------------------------------------------------------------------|---------------------------------------------|------------------------------------|-----------------------------------------|
| Group 1: Nullip single ceph $\geq$ 37<br>wks spon lab                                         | 898/6721                                       | 898/6721                                                          | 31.3                                        | 13.4                               | 4.2                                     |
| Group 2a: Nullip single ceph $\geq$ 37<br>wks induced                                         | 267/1270                                       | 267/1270                                                          | 5.9                                         | 21.0                               | 1.2                                     |
| Group 2b: Nullip single ceph $\geq$ 37<br>wks CS before lab                                   | 255/255                                        | 255/255                                                           | 1.2                                         | 100.0                              | 1.2                                     |
| Group 3: Multip (excl prev<br>caesarean sections) single ceph $\geq$<br>37 wks spon lab       | 220/7994                                       | 220/7994                                                          | 37.2                                        | 2.8                                | 1.0                                     |
| Group 4a: Multip (excl prev<br>caesarean sections) single ceph $\geq$<br>37 wks induced       | 39/1036                                        | 39/1036                                                           | 4.8                                         | 3.8                                | 0.2                                     |
| Group 4b: Multip (excl prev<br>caesarean sections) single ceph $\geq$<br>37 wks CS before lab | 111/111                                        | 111/111                                                           | 0.5                                         | 100.0                              | 0.5                                     |
| Group 5: Previous caesarean<br>section single ceph $\geq$ 37 wks                              | 1769/2012                                      | 1769/2012                                                         | 9.4                                         | 87.9                               | 8.2                                     |
| Group 6: All nulliparous, single<br>breeches                                                  | 232/288                                        | 232/288                                                           | 1.3                                         | 80.6                               | 1.1                                     |
| Group 7: All multiparous, single<br>breeches (incl previous caesarean<br>sections)            | 149/231                                        | 149/231                                                           | 1.1                                         | 64.5                               | 0.7                                     |
| Group 8: All multiple births (incl<br>previous caesarean sections)                            | 191/329                                        | 191/329                                                           | 1.5                                         | 58.1                               | 0.9                                     |
| Group 9: All single abnormal lies<br>(incl previous caesarean sections)                       | 223/309                                        | 223/309                                                           | 1.4                                         | 72.2                               | 1.0                                     |
| Group 10: All single ceph $\leq$ 36 wks<br>(incl previous caesarean sections)                 | 267/942                                        | 267/942                                                           | 4.4                                         | 28.3                               | 1.2                                     |
| Not stated                                                                                    | 0/0                                            |                                                                   | -                                           | -                                  | -                                       |
| <b>Total</b>                                                                                  |                                                |                                                                   | <b>100.0</b>                                |                                    | <b>21.5</b>                             |

Note: missing data are imputed using the observed distributions for caesarean births, then for non-caesarean births.

**Table S11.** Robson's Ten Group Classification System, including sub-groups, in Luxembourg 2015

|                                                                                               | Number of<br>CS/ all<br>women in<br>each group | Number of<br>CS/ all<br>women in<br>each group<br>imputed data | Relative<br>size of<br>each<br>group<br>(%) | CS rate<br>in each<br>group<br>(%) | Contribution<br>of each<br>group<br>(%) |
|-----------------------------------------------------------------------------------------------|------------------------------------------------|----------------------------------------------------------------|---------------------------------------------|------------------------------------|-----------------------------------------|
| Group 1: Nullip single ceph $\geq$<br>37 wks spon lab                                         | 303/1747                                       | 303/1747                                                       | 25.9                                        | 17.3                               | 4.5                                     |
| Group 2a: Nullip single ceph $\geq$<br>37 wks induced                                         | 311/853                                        | 311/853                                                        | 12.7                                        | 36.5                               | 4.6                                     |
| Group 2b: Nullip single ceph $\geq$<br>37 wks CS before lab                                   | 156/156                                        | 156/156                                                        | 2.3                                         | 100.0                              | 2.3                                     |
| Group 3: Multip (excl prev<br>caesarean sections) single<br>ceph $\geq$ 37 wks spon lab       | 68/1539                                        | 68/1539                                                        | 22.8                                        | 4.4                                | 1.0                                     |
| Group 4a: Multip (excl prev<br>caesarean sections) single<br>ceph $\geq$ 37 wks induced       | 39/752                                         | 39/752                                                         | 11.2                                        | 5.2                                | 0.6                                     |
| Group 4b: Multip (excl prev<br>caesarean sections) single<br>ceph $\geq$ 37 wks CS before lab | 69/69                                          | 69/69                                                          | 1.0                                         | 100.0                              | 1.0                                     |
| Group 5: Previous caesarean<br>section single ceph $\geq$ 37 wks                              | 620/817                                        | 621/818                                                        | 12.1                                        | 75.9                               | 9.2                                     |
| Group 6: All nulliparous, single<br>breeches                                                  | 189/196                                        | 189/196                                                        | 2.9                                         | 96.4                               | 2.8                                     |
| Group 7: All multiparous,<br>single breeches (incl previous<br>caesarean sections)            | 133/140                                        | 133/140                                                        | 2.1                                         | 95.0                               | 2.0                                     |
| Group 8: All multiple births<br>(incl previous caesarean<br>sections)                         | 103/125                                        | 103/125                                                        | 1.9                                         | 82.4                               | 1.5                                     |
| Group 9: All single abnormal<br>lies (incl previous caesarean<br>sections)                    | 29/31                                          | 29/31                                                          | 0.5                                         | 93.5                               | 0.4                                     |
| Group 10: All single ceph $\leq$ 36<br>wks (incl previous caesarean<br>sections)              | 119/310                                        | 119/310                                                        | 4.6                                         | 38.4                               | 1.8                                     |
| Not stated                                                                                    | 2/3                                            | -                                                              | -                                           | -                                  | -                                       |
| <b>Total</b>                                                                                  |                                                |                                                                | <b>100.0</b>                                |                                    | <b>31.8</b>                             |

Note: missing data are imputed using the observed distributions for caesarean births, then for non-caesarean births.

**Table S12.** Robson's Ten Group Classification System, including sub-groups, in Malta 2015

|                                                                                               | Number of<br>CS/ all<br>women in<br>each group | Number of<br>CS/ all<br>women in<br>each group<br>imputed<br>data | Relative<br>size of<br>each<br>group<br>(%) | CS rate<br>in each<br>group<br>(%) | Contribution<br>of each<br>group<br>(%) |
|-----------------------------------------------------------------------------------------------|------------------------------------------------|-------------------------------------------------------------------|---------------------------------------------|------------------------------------|-----------------------------------------|
| Group 1: Nullip single ceph $\geq$ 37<br>wks spon lab                                         | 152/1076                                       | 152/1076                                                          | 24.5                                        | 14.1                               | 3.5                                     |
| Group 2a: Nullip single ceph $\geq$ 37<br>wks induced                                         | 160/710                                        | 160/710                                                           | 16.2                                        | 22.5                               | 3.6                                     |
| Group 2b: Nullip single ceph $\geq$ 37<br>wks CS before lab                                   | 181/181                                        | 181/181                                                           | 4.1                                         | 100.0                              | 4.1                                     |
| Group 3: Multip (excl prev<br>caesarean sections) single ceph $\geq$<br>37 wks spon lab       | 32/880                                         | 32/880                                                            | 20.1                                        | 3.6                                | 0.7                                     |
| Group 4a: Multip (excl prev<br>caesarean sections) single ceph $\geq$<br>37 wks induced       | 17/440                                         | 17/440                                                            | 10.0                                        | 3.9                                | 0.4                                     |
| Group 4b: Multip (excl prev<br>caesarean sections) single ceph $\geq$<br>37 wks CS before lab | 73/73                                          | 73/73                                                             | 1.7                                         | 100.0                              | 1.7                                     |
| Group 5: Previous caesarean<br>section single ceph $\geq$ 37 wks                              | 450/591                                        | 450/591                                                           | 13.5                                        | 76.1                               | 10.3                                    |
| Group 6: All nulliparous, single<br>breeches                                                  | 88/90                                          | 88/90                                                             | 2.1                                         | 97.8                               | 2.0                                     |
| Group 7: All multiparous, single<br>breeches (incl previous caesarean<br>sections)            | 42/43                                          | 42/43                                                             | 1.0                                         | 97.7                               | 1.0                                     |
| Group 8: All multiple births (incl<br>previous caesarean sections)                            | 67/68                                          | 67/68                                                             | 1.6                                         | 98.5                               | 1.5                                     |
| Group 9: All single abnormal lies<br>(incl previous caesarean sections)                       | 7/7                                            | 7/7                                                               | 0.2                                         | 100.0                              | 0.2                                     |
| Group 10: All single ceph $\leq$ 36 wks<br>(incl previous caesarean sections)                 | 91/227                                         | 91/227                                                            | 5.2                                         | 40.1                               | 2.1                                     |
| Not stated                                                                                    | 0/0                                            | -                                                                 | -                                           | -                                  | -                                       |
| <b>Total</b>                                                                                  |                                                |                                                                   | <b>100.0</b>                                |                                    | <b>31.0</b>                             |

Note: missing data are imputed using the observed distributions for caesarean births, then for non-caesarean births.

**Table S13.** Robson's Ten Group Classification System, including sub-groups, in Netherlands 2015

|                                                                                         | Number of<br>CS/ all<br>women in<br>each group | Number of<br>CS/ all<br>women in<br>each group<br>imputed<br>data | Relative<br>size of<br>each<br>group<br>(%) | CS rate<br>in each<br>group<br>(%) | Contribution<br>of each<br>group<br>(%) |
|-----------------------------------------------------------------------------------------|------------------------------------------------|-------------------------------------------------------------------|---------------------------------------------|------------------------------------|-----------------------------------------|
| Group 1: Nullip single ceph $\geq$ 37 wks spon lab                                      | 4401/46481                                     | 4540/47891                                                        | 28.8                                        | 9.5                                | 2.7                                     |
| Group 2a: Nullip single ceph $\geq$ 37 wks induced                                      | 3371/15259                                     | 3477/15724                                                        | 9.4                                         | 22.1                               | 2.1                                     |
| Group 2b: Nullip single ceph $\geq$ 37 wks CS before lab                                | 773/773                                        | 797/797                                                           | 0.5                                         | 100.0                              | 0.5                                     |
| Group 3: Multip (excl prev caesarean sections) single ceph $\geq$ 37 wks spon lab       | 878/52277                                      | 906/53858                                                         | 32.3                                        | 1.7                                | 0.5                                     |
| Group 4a: Multip (excl prev caesarean sections) single ceph $\geq$ 37 wks induced       | 777/16155                                      | 802/16645                                                         | 10.0                                        | 4.8                                | 0.5                                     |
| Group 4b: Multip (excl prev caesarean sections) single ceph $\geq$ 37 wks CS before lab | 1744/1744                                      | 1799/1799                                                         | 1.1                                         | 100.0                              | 1.1                                     |
| Group 5: Previous caesarean section single ceph $\geq$ 37 wks                           | 7134/12094                                     | 7359/12469                                                        | 7.5                                         | 59.0                               | 4.4                                     |
| Group 6: All nulliparous, single breeches                                               | 3006/3628                                      | 3101/3742                                                         | 2.2                                         | 82.9                               | 1.9                                     |
| Group 7: All multiparous, single breeches (incl previous caesarean sections)            | 1691/2188                                      | 1744/2256                                                         | 1.4                                         | 77.3                               | 1.0                                     |
| Group 8: All multiple births (incl previous caesarean sections)                         | 1134/2685                                      | 1170/2768                                                         | 1.7                                         | 42.3                               | 0.7                                     |
| Group 9: All single abnormal lies (incl previous caesarean sections)                    | 679/897                                        | 700/925                                                           | 0.6                                         | 75.7                               | 0.4                                     |
| Group 10: All single ceph $\leq$ 36 wks (incl previous caesarean sections)              | 1614/7448                                      | 1665/7675                                                         | 4.6                                         | 21.7                               | 1.0                                     |
| Not stated                                                                              | 497/4920                                       | -                                                                 | -                                           | -                                  | -                                       |
| <b>Total</b>                                                                            |                                                |                                                                   | <b>100.0</b>                                |                                    | <b>16.8</b>                             |

Note: missing data are imputed using the observed distributions for caesarean births, then for non-caesarean births. Because of the low proportion of missing data for caesareans, we first imputed the missing data into caesarean/non-caesarean using the overall caesarean rate.

**Table S14.** Robson's Ten Group Classification System, including sub-groups, in Northern Ireland 2015

|                                                                                               | Number of<br>CS/ all<br>women in<br>each group | Number of<br>CS/ all<br>women in<br>each group<br>imputed<br>data | Relative<br>size of<br>each<br>group<br>(%) | CS rate<br>in each<br>group<br>(%) | Contribution<br>of each<br>group<br>(%) |
|-----------------------------------------------------------------------------------------------|------------------------------------------------|-------------------------------------------------------------------|---------------------------------------------|------------------------------------|-----------------------------------------|
| Group 1: Nullip single ceph $\geq$ 37<br>wks spon lab                                         | 466/3879                                       | 483/3922                                                          | 16.2                                        | 12.3                               | 2.0                                     |
| Group 2a: Nullip single ceph $\geq$ 37<br>wks induced                                         | 1037/3644                                      | 1075/3702                                                         | 15.3                                        | 29.0                               | 4.4                                     |
| Group 2b: Nullip single ceph $\geq$ 37<br>wks CS before lab                                   | 395/395                                        | 410/410                                                           | 1.7                                         | 100.0                              | 1.7                                     |
| Group 3: Multip (excl prev<br>caesarean sections) single ceph $\geq$<br>37 wks spon lab       | 119/5625                                       | 123/5670                                                          | 23.4                                        | 2.2                                | 0.5                                     |
| Group 4a: Multip (excl prev<br>caesarean sections) single ceph $\geq$<br>37 wks induced       | 167/3831                                       | 173/3865                                                          | 16.0                                        | 4.5                                | 0.7                                     |
| Group 4b: Multip (excl prev<br>caesarean sections) single ceph $\geq$<br>37 wks CS before lab | 357/357                                        | 370/370                                                           | 1.5                                         | 100.0                              | 1.5                                     |
| Group 5: Previous caesarean<br>section single ceph $\geq$ 37 wks                              | 2768/3610                                      | 2870/3718                                                         | 15.4                                        | 77.2                               | 11.9                                    |
| Group 6: All nulliparous, single<br>breeches                                                  | 407/431                                        | 422/446                                                           | 1.8                                         | 94.6                               | 1.7                                     |
| Group 7: All multiparous, single<br>breeches (incl previous caesarean<br>sections)            | 410/456                                        | 425/471                                                           | 1.9                                         | 90.2                               | 1.8                                     |
| Group 8: All multiple births (incl<br>previous caesarean sections)                            | 251/356                                        | 260/366                                                           | 1.5                                         | 71.0                               | 1.1                                     |
| Group 9: All single abnormal lies<br>(incl previous caesarean sections)                       | 16/73                                          | 17/74                                                             | 0.3                                         | 23.0                               | 0.1                                     |
| Group 10: All single ceph $\leq$ 36 wks<br>(incl previous caesarean sections)                 | 432/1158                                       | 448/1179                                                          | 4.9                                         | 38.0                               | 1.9                                     |
| Not stated                                                                                    | 252/380                                        | -                                                                 | -                                           | -                                  | -                                       |
| <b>Total</b>                                                                                  |                                                |                                                                   | <b>100.0</b>                                |                                    | <b>29.2</b>                             |

Note: missing data are imputed using the observed distributions for caesarean births, then for non-caesarean births.

**Table S15.** Robson's Ten Group Classification System, including sub-groups, in Norway 2015

|                                                                                               | Number of<br>CS/ all<br>women in<br>each group | Number of<br>CS/ all<br>women in<br>each group<br>imputed<br>data | Relative<br>size of<br>each<br>group<br>(%) | CS rate<br>in each<br>group<br>(%) | Contribution<br>of each<br>group<br>(%) |
|-----------------------------------------------------------------------------------------------|------------------------------------------------|-------------------------------------------------------------------|---------------------------------------------|------------------------------------|-----------------------------------------|
| Group 1: Nullip single ceph $\geq$ 37<br>wks spon lab                                         | 1434/16511                                     | 1441/16572                                                        | 28.1                                        | 8.7                                | 2.4                                     |
| Group 2a: Nullip single ceph $\geq$ 37<br>wks induced                                         | 1207/5263                                      | 1213/5284                                                         | 9.0                                         | 23.0                               | 2.1                                     |
| Group 2b: Nullip single ceph $\geq$ 37<br>wks CS before lab                                   | 360/366                                        | 362/368                                                           | 0.6                                         | 98.4                               | 0.6                                     |
| Group 3: Multip (excl prev<br>caesarean sections) single ceph $\geq$<br>37 wks spon lab       | 362/20524                                      | 364/20598                                                         | 35.0                                        | 1.8                                | 0.6                                     |
| Group 4a: Multip (excl prev<br>caesarean sections) single ceph $\geq$<br>37 wks induced       | 279/4757                                       | 280/4774                                                          | 8.1                                         | 5.9                                | 0.5                                     |
| Group 4b: Multip (excl prev<br>caesarean sections) single ceph $\geq$<br>37 wks CS before lab | 499/501                                        | 502/504                                                           | 0.9                                         | 99.6                               | 0.9                                     |
| Group 5: Previous caesarean<br>section single ceph $\geq$ 37 wks                              | 2426/5058                                      | 2438/5079                                                         | 8.6                                         | 48.0                               | 4.1                                     |
| Group 6: All nulliparous, single<br>breeches                                                  | 872/1233                                       | 876/1238                                                          | 2.1                                         | 70.8                               | 1.5                                     |
| Group 7: All multiparous, single<br>breeches (incl previous caesarean<br>sections)            | 531/864                                        | 534/868                                                           | 1.5                                         | 61.5                               | 0.9                                     |
| Group 8: All multiple births (incl<br>previous caesarean sections)                            | 463/998                                        | 465/1002                                                          | 1.7                                         | 46.4                               | 0.8                                     |
| Group 9: All single abnormal lies<br>(incl previous caesarean sections)                       | 204/205                                        | 205/206                                                           | 0.3                                         | 99.5                               | 0.3                                     |
| Group 10: All single ceph $\leq$ 36 wks<br>(incl previous caesarean sections)                 | 738/2427                                       | 742/2437                                                          | 4.1                                         | 30.4                               | 1.3                                     |
| Not stated                                                                                    | 48/225                                         | -                                                                 | -                                           | -                                  | -                                       |
| <b>Total</b>                                                                                  |                                                |                                                                   | <b>100.0</b>                                |                                    | <b>16.0</b>                             |

Note: missing data are imputed using the observed distributions for caesarean births, then for non-caesarean births.

**Table S16.** Robson's Ten Group Classification System, including sub-groups, in Slovenia 2015

|                                                                                               | Number of<br>CS/ all<br>women in<br>each group | Number of<br>CS/ all<br>women in<br>each group<br>imputed<br>data | Relative<br>size of<br>each<br>group<br>(%) | CS rate<br>in each<br>group<br>(%) | Contribution<br>of each<br>group<br>(%) |
|-----------------------------------------------------------------------------------------------|------------------------------------------------|-------------------------------------------------------------------|---------------------------------------------|------------------------------------|-----------------------------------------|
| Group 1: Nullip single ceph $\geq$ 37<br>wks spon lab                                         | 752/6574                                       | 755/6583                                                          | 33.0                                        | 11.5                               | 3.8                                     |
| Group 2a: Nullip single ceph $\geq$ 37<br>wks induced                                         | 437/1716                                       | 439/1719                                                          | 8.6                                         | 25.5                               | 2.2                                     |
| Group 2b: Nullip single ceph $\geq$ 37<br>wks CS before lab                                   | 186/186                                        | 187/187                                                           | 0.9                                         | 100.0                              | 0.9                                     |
| Group 3: Multip (excl prev<br>caesarean sections) single ceph $\geq$<br>37 wks spon lab       | 193/6466                                       | 194/6473                                                          | 32.5                                        | 3.0                                | 1.0                                     |
| Group 4a: Multip (excl prev<br>caesarean sections) single ceph $\geq$<br>37 wks induced       | 49/1297                                        | 49/1298                                                           | 6.5                                         | 3.8                                | 0.2                                     |
| Group 4b: Multip (excl prev<br>caesarean sections) single ceph $\geq$<br>37 wks CS before lab | 260/260                                        | 261/261                                                           | 1.3                                         | 100.0                              | 1.3                                     |
| Group 5: Previous caesarean<br>section single ceph $\geq$ 37 wks                              | 987/1281                                       | 991/1285                                                          | 6.4                                         | 77.1                               | 5.0                                     |
| Group 6: All nulliparous, single<br>breeches                                                  | 447/499                                        | 449/501                                                           | 2.5                                         | 89.6                               | 2.3                                     |
| Group 7: All multiparous, single<br>breeches (incl previous caesarean<br>sections)            | 222/266                                        | 223/267                                                           | 1.3                                         | 83.5                               | 1.1                                     |
| Group 8: All multiple births (incl<br>previous caesarean sections)                            | 239/393                                        | 240/394                                                           | 2.0                                         | 60.9                               | 1.2                                     |
| Group 9: All single abnormal lies<br>(incl previous caesarean sections)                       | 26/26                                          | 26/26                                                             | 0.1                                         | 100.0                              | 0.1                                     |
| Group 10: All single ceph $\leq$ 36 wks<br>(incl previous caesarean sections)                 | 265/947                                        | 266/949                                                           | 4.8                                         | 28.0                               | 1.3                                     |
| Not stated                                                                                    | 17/32                                          | -                                                                 | -                                           | -                                  | -                                       |
| <b>Total</b>                                                                                  |                                                |                                                                   | <b>100.0</b>                                |                                    | <b>20.5</b>                             |

Note: missing data are imputed using the observed distributions for caesarean births, then for non-caesarean births.



**Table S17.** Robson's Ten Group Classification System, including sub-groups, in Sweden 2015

|                                                                                               | Number of<br>CS/ all<br>women in<br>each group | Number of<br>CS/ all<br>women in<br>each group<br>imputed<br>data | Relative<br>size of<br>each<br>group<br>(%) | CS rate<br>in each<br>group<br>(%) | Contribution<br>of each<br>group<br>(%) |
|-----------------------------------------------------------------------------------------------|------------------------------------------------|-------------------------------------------------------------------|---------------------------------------------|------------------------------------|-----------------------------------------|
| Group 1: Nullip single ceph $\geq$ 37<br>wks spon lab                                         | 2935/34958                                     | 2936/34968                                                        | 30.4                                        | 8.4                                | 2.6                                     |
| Group 2a: Nullip single ceph $\geq$ 37<br>wks induced                                         | 2149/8591                                      | 2150/8594                                                         | 7.5                                         | 25.0                               | 1.9                                     |
| Group 2b: Nullip single ceph $\geq$ 37<br>wks CS before lab                                   | 1380/1380                                      | 1380/1380                                                         | 1.2                                         | 100.0                              | 1.2                                     |
| Group 3: Multip (excl prev<br>caesarean sections) single ceph $\geq$<br>37 wks spon lab       | 755/41091                                      | 755/41102                                                         | 35.7                                        | 1.8                                | 0.7                                     |
| Group 4a: Multip (excl prev<br>caesarean sections) single ceph $\geq$<br>37 wks induced       | 356/7256                                       | 356/7258                                                          | 6.3                                         | 4.9                                | 0.3                                     |
| Group 4b: Multip (excl prev<br>caesarean sections) single ceph $\geq$<br>37 wks CS before lab | 1385/1385                                      | 1385/1385                                                         | 1.2                                         | 100.0                              | 1.2                                     |
| Group 5: Previous caesarean<br>section single ceph $\geq$ 37 wks                              | 5518/10348                                     | 5520/10351                                                        | 9.0                                         | 53.3                               | 4.8                                     |
| Group 6: All nulliparous, single<br>breeches                                                  | 1880/2018                                      | 1881/2019                                                         | 1.8                                         | 93.2                               | 1.6                                     |
| Group 7: All multiparous, single<br>breeches (incl previous caesarean<br>sections)            | 1066/1250                                      | 1066/1250                                                         | 1.1                                         | 85.3                               | 0.9                                     |
| Group 8: All multiple births (incl<br>previous caesarean sections)                            | 918/1669                                       | 918/1669                                                          | 1.5                                         | 55.0                               | 0.8                                     |
| Group 9: All single abnormal lies<br>(incl previous caesarean sections)                       | 257/303                                        | 257/303                                                           | 0.3                                         | 84.8                               | 0.2                                     |
| Group 10: All single ceph $\leq$ 36 wks<br>(incl previous caesarean sections)                 | 1442/4717                                      | 1443/4719                                                         | 4.1                                         | 30.6                               | 1.3                                     |
| Not stated                                                                                    | 7/33                                           | -                                                                 | -                                           | -                                  | -                                       |
| <b>Total</b>                                                                                  |                                                |                                                                   | <b>100.0</b>                                |                                    | <b>17.4</b>                             |

Note: missing data are imputed using the observed distributions for caesarean births, then for non-caesarean births.

**Table S18.** Robson's Ten Group Classification System, including sub-groups, in Switzerland 2014

|                                                                                               | Number of<br>CS/ all<br>women in<br>each group | Number of<br>CS/ all<br>women in<br>each group<br>imputed data | Relative<br>size of<br>each<br>group<br>(%) | CS rate<br>in each<br>group<br>(%) | Contribution<br>of each<br>group<br>(%) |
|-----------------------------------------------------------------------------------------------|------------------------------------------------|----------------------------------------------------------------|---------------------------------------------|------------------------------------|-----------------------------------------|
| Group 1: Nullip single ceph $\geq$<br>37 wks spon lab                                         | 3206/20311                                     | 3400/21523                                                     | 25.7                                        | 15.8                               | 4.1                                     |
| Group 2a: Nullip single ceph $\geq$<br>37 wks induced                                         | 2413/8513                                      | 2559/9022                                                      | 10.8                                        | 28.4                               | 3.1                                     |
| Group 2b: Nullip single ceph $\geq$<br>37 wks CS before lab                                   | 2573/2573                                      | 2729/2729                                                      | 3.3                                         | 100.0                              | 3.3                                     |
| Group 3: Multip (excl prev<br>caesarean sections) single<br>ceph $\geq$ 37 wks spon lab       | 845/19956                                      | 896/21144                                                      | 25.3                                        | 4.2                                | 1.1                                     |
| Group 4a: Multip (excl prev<br>caesarean sections) single<br>ceph $\geq$ 37 wks induced       | 315/5746                                       | 334/6088                                                       | 7.3                                         | 5.5                                | 0.4                                     |
| Group 4b: Multip (excl prev<br>caesarean sections) single<br>ceph $\geq$ 37 wks CS before lab | 2362/2362                                      | 2505/2505                                                      | 3.0                                         | 100.0                              | 3.0                                     |
| Group 5: Previous caesarean<br>section single ceph $\geq$ 37 wks                              | 5887/6831                                      | 6244/7244                                                      | 8.7                                         | 86.2                               | 7.5                                     |
| Group 6: All nulliparous, single<br>breeches                                                  | 2553/2628                                      | 2708/2787                                                      | 3.3                                         | 97.2                               | 3.2                                     |
| Group 7: All multiparous,<br>single breeches (incl previous<br>caesarean sections)            | 1169/1254                                      | 1240/1330                                                      | 1.6                                         | 93.2                               | 1.5                                     |
| Group 8: All multiple births<br>(incl previous caesarean<br>sections)                         | 1250/1550                                      | 1326/1644                                                      | 2.0                                         | 80.7                               | 1.6                                     |
| Group 9: All single abnormal<br>lies (incl previous caesarean<br>sections)                    | 2530/3562                                      | 2683/3776                                                      | 4.5                                         | 71.1                               | 3.2                                     |
| Group 10: All single ceph $\leq$ 36<br>wks (incl previous caesarean<br>sections)              | 1560/3644                                      | 1655/3863                                                      | 4.6                                         | 42.8                               | 2.0                                     |
| Not stated                                                                                    | 135/4727                                       |                                                                | -                                           | -                                  | -                                       |
| <b>Total</b>                                                                                  |                                                |                                                                | <b>100.0</b>                                |                                    | <b>33.8</b>                             |

Note: missing data are imputed using the observed distributions for caesarean births, then for non-caesarean births. Because of the low proportion of missing data for caesareans, we first imputed the missing data into caesarean/non-caesarean using the overall caesarean rate.
